# Supplementary material for: Adherence to Trained Standards After a Faculty Development Workshop on “Teaching With Simulated Patients”
Source: PubMed Central journal article supplement (PMC5654119; doi:10.3205/zma001122), 2017-10-16
Supplement: JME-34-45-s-001.pdf [file JME-34-45-s-001.pdf]

## Observation Checklist

| No.    | Category/ Items                                                      | Yes | Partly | No | Not applicable |
|--------|----------------------------------------------------------------------|-----|--------|----|----------------|
| 1      | <b>Beginning of session</b><br>The teacher...                        |     |        |    |                |
| 1.1    | ... asks about teamwork in PBL course.                               |     |        |    |                |
| 1.2    | ... introduces learning objectives.                                  |     |        |    |                |
| 1.3    | ... introduces schedule for session.                                 |     |        |    |                |
| 1.4    | ... asks about current issues of group members.                      |     |        |    |                |
| 2      | <b>Interaction with simulated patient (SP)</b><br>The teacher...     | Yes | Partly | No | Not applicable |
| 2.1    | ...appoints one student to talk to the SP.                           |     |        |    |                |
| 2.2    | ...makes sure the group knows the important facts about the SP-case. |     |        |    |                |
| 2.3    | ... discusses learning objectives of the SP-case in group.           |     |        |    |                |
| 2.4    | ... activates prior knowledge of students.                           |     |        |    |                |
| 2.5    | ... distributes specific observation tasks.                          |     |        |    |                |
| 2.6    | A setting for the simulation is prepared.                            |     |        |    |                |
| 2.7    | ... talks to SP prior to simulation.                                 |     |        |    |                |
| 2.8    | ... stays in his/her role as an observer during simulation.          |     |        |    |                |
| 2.9    | SP leaves the room when simulation is finished.                      |     |        |    |                |
| 2.9.1  | ... makes sure the SP leaves the room when simulation is finished.   |     |        |    |                |
| 2.10   | ... makes sure nobody gives feedback until SP is back in the room.   |     |        |    |                |
| 2.11   | A setting for the feedback is prepared.                              |     |        |    |                |
| 2.12   | ... makes sure feedback is given in the recommended order.           |     |        |    |                |
| 2.13   | ... makes sure the student summarizes what she/he has learned.       |     |        |    |                |
| 2.14   | SP is involved in evaluation and discussion.                         |     |        |    |                |
| 2.15   | A discussion takes place.                                            |     |        |    |                |
| 2.15.1 | ... makes sure that evaluation stays separated from discussion.      |     |        |    |                |
| 2.15.2 | ... facilitates group discussion & reflection.                       |     |        |    |                |
| 3      | <b>Feedback culture</b><br>The teacher...                            |     |        |    |                |
| 3.1    | ... starts with a positive comment.                                  |     |        |    |                |

| No.   | Category/ Items                                                                 | Yes | Partly | No | Not applicable |
|-------|---------------------------------------------------------------------------------|-----|--------|----|----------------|
| 3.2   | <i>... provides „I-messages“</i>                                                |     |        |    |                |
| 3.3   | <i>... reports specific observations without interpreting.</i>                  |     |        |    |                |
| 3.4   | <i>... combines criticism with constructive suggestions for improvement.</i>    |     |        |    |                |
| 3.5   | <i>... only comments on changeable behaviors.</i>                               |     |        |    |                |
| 3.6   | <i>... limits feedback to a few important comments.</i>                         |     |        |    |                |
| 3.7   | <i>All the students follow the rules of giving feedback.</i>                    |     |        |    |                |
| 3.7.1 | <i>... intervenes when students do not follow the rules of giving feedback.</i> |     |        |    |                |
| 4     | <b>Content</b><br><i>The teacher...</i>                                         |     |        |    |                |
| 4.1   | <i>... orients him-/herself towards the semester’s learning objectives.</i>     |     |        |    |                |
| 5     | <b>Facilitation</b><br><i>The teacher...</i>                                    |     |        |    |                |
| 5.1   | <i>... acts as a facilitator.</i>                                               |     |        |    |                |
| 5.2   | <i>... summarizes important aspects.</i>                                        |     |        |    |                |
| 5.3   | <i>... activates students to participate.</i>                                   |     |        |    |                |
| 5.4   | <i>...visualizes important aspects.</i>                                         |     |        |    |                |
| 6     | <b>End of session</b><br><i>The teacher...</i>                                  |     |        |    |                |
| 6.1   | <i>... initiates a final feedback round.</i>                                    |     |        |    |                |
| 6.2   | <i>... provides an outlook on the next session.</i>                             |     |        |    |                |
| 7     | <b>Structure of session</b><br><i>The teacher...</i>                            |     |        |    |                |
| 7.1   | <i>... initiates a break.</i>                                                   |     |        |    |                |
| 7.2   | <i>... adheres to the timeframe.</i>                                            |     |        |    |                |

**Overall rating of teaching performance (1 = very good – 5= very poor)**

|   |   |   |   |   |
|---|---|---|---|---|
| 1 | 2 | 3 | 4 | 5 |
|---|---|---|---|---|

Note: For all checklist items, complementary behavioral anchors were developed. They can be obtained from the authors.
