# Supplementary material for: Adherence to Trained Standards After a Faculty Development Workshop on “Teaching With Simulated Patients”
Source: PubMed Central journal article supplement (PMC5654119; doi:10.3205/zma001122), 2017-10-16
Supplement: JME-34-45-s-002.pdf [file JME-34-45-s-002.pdf]

ATTACHMENT B

Table B 1

Percentage frequency of observer's ratings of the checklist items (N=60)

| No.  | Category/ Items                                                       | Yes (%) | Partly (%) | No (%) | Not applicable(%) |
|------|-----------------------------------------------------------------------|---------|------------|--------|-------------------|
| 1    | <b>Beginning of session</b><br>The teacher...                         |         |            |        |                   |
| 1.1  | ... asks about teamwork in PBL course.                                | 20      | 5          | 71     | 3                 |
| 1.2  | ... introduces learning objectives.                                   | 48      |            | 48     | 3                 |
| 1.3  | ... introduces schedule for session.                                  | 51      | 28         | 17     | 3                 |
| 1.4  | ... asks about current issues of group members.                       | 42      | 15         | 40     | 3                 |
| 2    | <b>Interaction with simulated patient (SP)</b><br>The teacher...      |         |            |        |                   |
| 2.1  | ...appoints one student to talk to the SP.                            | 100     |            | 0      | 0                 |
| 2.2  | ...makes sure the group knows the important facts about the SP-case.  | 62      | 17         | 17     | 5                 |
| 2.3  | ... discusses learning objectives of the SP-case in group.            | 40      | 32         | 23     | 5                 |
| 2.4  | ... activates prior knowledge of students.                            | 50      | 18         | 28     | 3                 |
| 2.5  | ... distributes specific observation tasks.                           | 81      |            | 19     | 0                 |
| 2.6  | A setting for the simulation is prepared.                             | 97      |            | 3      | 0                 |
| 2.7  | ... talks to SP prior to simulation.                                  | 97      |            | 3      | 0                 |
| 2.8  | ... stays in his/her role as an observer during simulation.           | 100     | 0          | 0      | 0                 |
| 2.9  | SP leaves the room when simulation is finished.                       | 100     |            | 0      | 0                 |
| 2.10 | ... makes sure nobody gives feedback until SP is back in the room.    | 72      | 17         | 10     | 2                 |
| 2.11 | A setting for the feedback is prepared.                               | 60      | 10         | 30     | 0                 |
| 2.12 | ... makes sure feedback is given in the recommended order.            | 77      | 15         | 8      | 0                 |
| 2.13 | ... makes sure the student summarizes what she/he has learned.        | 25      | 10         | 64     | 0                 |
| 2.14 | SP is involved in evaluation and discussion.                          | 62      | 28         | 10     | 0                 |
| 2.15 | A discussion takes place.                                             | 82      |            | 17     | 2                 |
| 3    | <b>Feedback culture</b><br>The teacher...                             |         |            |        |                   |
| 3.1  | ... starts with a positive comment.                                   | 70      | 10         | 12     | 8                 |
| 3.2  | ... provides „I-messages“                                             | 78      | 13         | 2      | 7                 |
| 3.3  | ... reports specific observations without interpreting.               | 75      | 15         | 3      | 7                 |
| 3.4  | ... combines criticism with constructive suggestions for improvement. | 67      | 22         | 2      | 10                |
| 3.5  | ... only comments on changeable behaviors.                            | 92      |            | 0      | 9                 |
| 3.6  | ... limits feedback to a few important comments.                      | 88      | 3          | 2      | 7                 |

| No. | Category/ Items                                                             | Yes (%) | Partly (%) | No (%) | Not applicable (%) |
|-----|-----------------------------------------------------------------------------|---------|------------|--------|--------------------|
| 3.7 | <i>All the students follow the rules of giving feedback.</i>                | 68      | 30         | 0      | 2                  |
| 4   | <b>Content</b><br><i>The teacher...</i>                                     |         |            |        |                    |
| 4.1 | <i>... orients him-/herself towards the semester's learning objectives.</i> | 98      | 2          | 0      | 0                  |
| 5   | <b>Facilitation</b><br><i>The teacher...</i>                                |         |            |        |                    |
| 5.1 | <i>... acts as a facilitator.</i>                                           | 90      | 8          | 2      | 0                  |
| 5.2 | <i>... summarizes important aspects.</i>                                    | 46      | 36         | 19     | 0                  |
| 5.3 | <i>... activates students to participate.</i>                               | 73      | 20         | 5      | 2                  |
| 5.4 | <i>...visualizes important aspects.</i>                                     | 38      | 17         | 43     | 2                  |
| 6   | <b>End of session</b><br><i>The teacher...</i>                              |         |            |        |                    |
| 6.1 | <i>... initiates a final feedback round.</i>                                | 52      | 5          | 40     | 3                  |
| 6.2 | <i>... provides an outlook on the next session.</i>                         | 42      | 22         | 25     | 12                 |
| 7   | <b>Structure of session</b><br><i>The teacher...</i>                        |         |            |        |                    |
| 7.1 | <i>... initiates a break.</i>                                               | 82      |            | 17     | 0                  |
| 7.2 | <i>... adheres to the timeframe.</i>                                        | 63      |            | 37     | 0                  |

Note. All items which were fulfilled by at least 76% of teachers are colored dark green, items fulfilled by 50 to 75% are colored light green, items fulfilled by 26 to 50% are colored yellow and those fulfilled by less than 26% are colored red. This table excludes the four "subitems" as they were not relevant in all observations. Grey boxes indicate, that rating *partly* was not allowed for those items. Percentages do not add up to 100% because of rounding.

Table B 2

Percentage frequency of observer's ratings of overall teaching performance (N=60)

| Rating | 1  | 2  | 3  | 4 | 5 |
|--------|----|----|----|---|---|
| %      | 30 | 47 | 20 | 3 | 0 |

Note. Rating from 1 = very good to 5 = very poor.
